# Supplementary material
Source: PubMed Central journal article supplement (PMC5373392)
Supplement: pnas.1616493114.sapp.pdf [file pnas.1616493114.sapp.pdf]

Supplemental material to:

## **Auxin response cell-autonomously controls ground tissue initiation in the early Arabidopsis embryo**

Barbara K. Möller, Colette A. ten Hove, Daoquan Xiang, Nerys A. Williams, Lorena González López, Saiko Yoshida, Margot E. Smit, Raju Datla and Dolf Weijers

### **Contents:**

**Supplemental Figure 1: Expression of GRAS family genes**

**Supplemental Figure 2: Expression patterns of genes downregulated in globular stage Q0990>>bdl embryos**

**Supplemental Figure 3: Expression patterns of MP-dependent genes downregulated in globular stage Q0990>>bdl embryos**

**Supplemental Figure 4: Expression patterns of ground tissue-expressed genes downregulated in globular stage Q0990>>bdl embryos**

**Supplemental Figure 5 Tools for tissue-specific bdl misexpression**

**Supplemental Table 1: List of significantly downregulated genes in the *Q0990>>bdl* microarray on globular stage embryos**

**Supplemental Table 2: Expression pattern analysis of putative MP target genes involved in root initiation**

**Supplemental Table 3: Primers used for cloning**

**Experimental Procedures**

**Supplemental References**

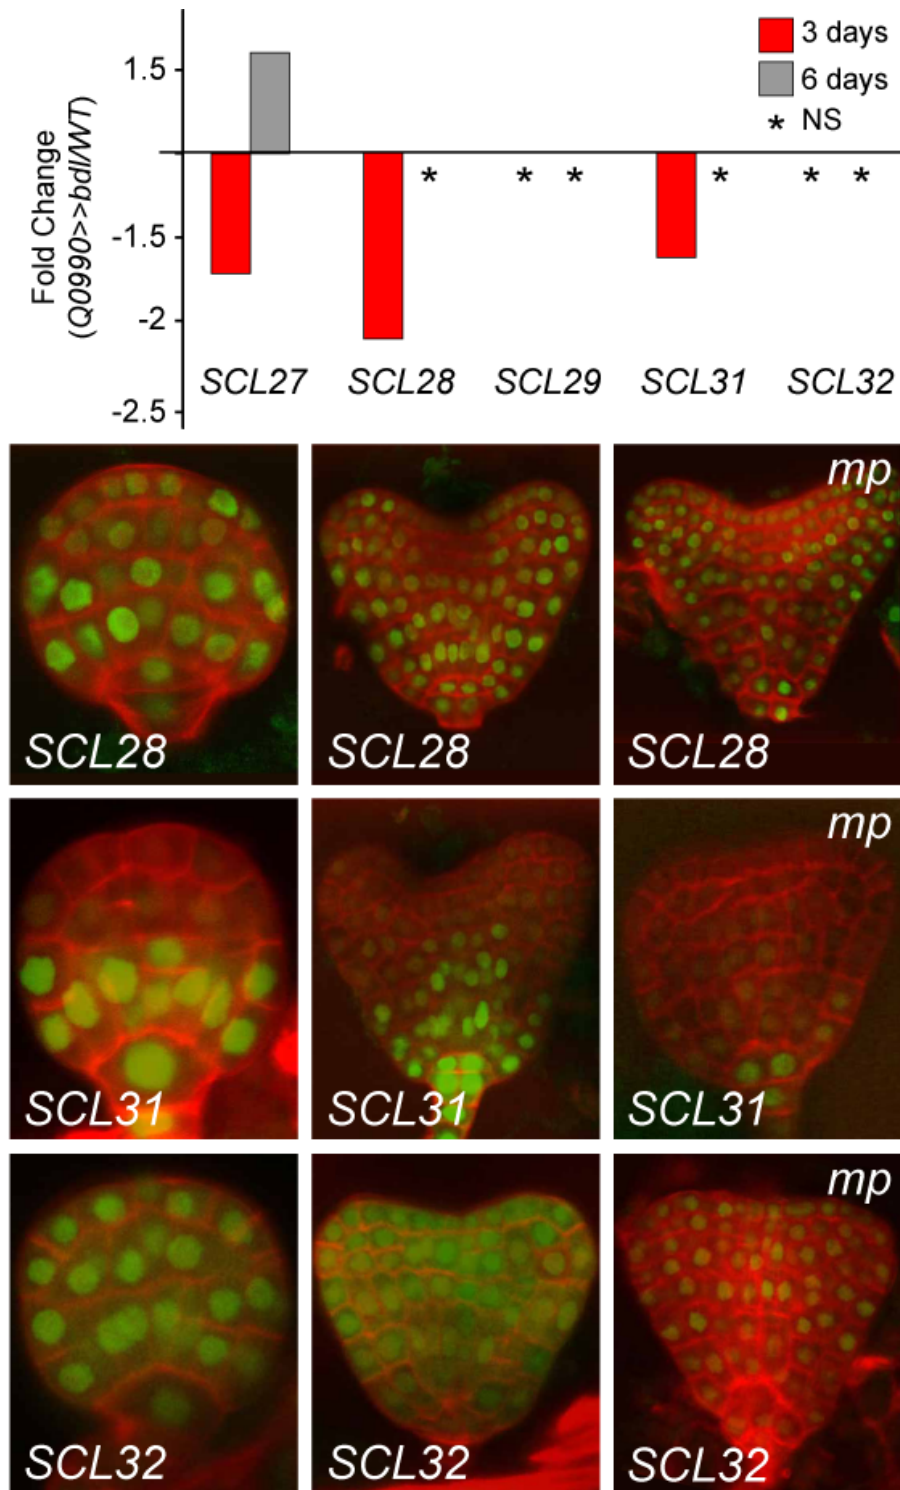

### Supplemental Figure 1: Expression of GRAS family genes

(top) Differential gene expression of GRAS family genes downregulated in the *Q0990>>bdl* microarray (in fold change *Q0990>>bdl/Q0990>>WT*) in *Q0990>>bdl* embryos at 3 days (red columns) and 6 days (grey columns) after pollination. NS, not significant. (bottom) Expression of promoter-n3GFP (for *SCL28*) or nuclear tdTomato reporters (for *SCL31* and *SCL32*; all in green) in wild-type and *mp* mutant embryos. p*SCL27*-ntdTomato and p*SCL29*-ntdTomato were not expressed in embryos. Red counterstaining is Renaissance RS2200 signal.

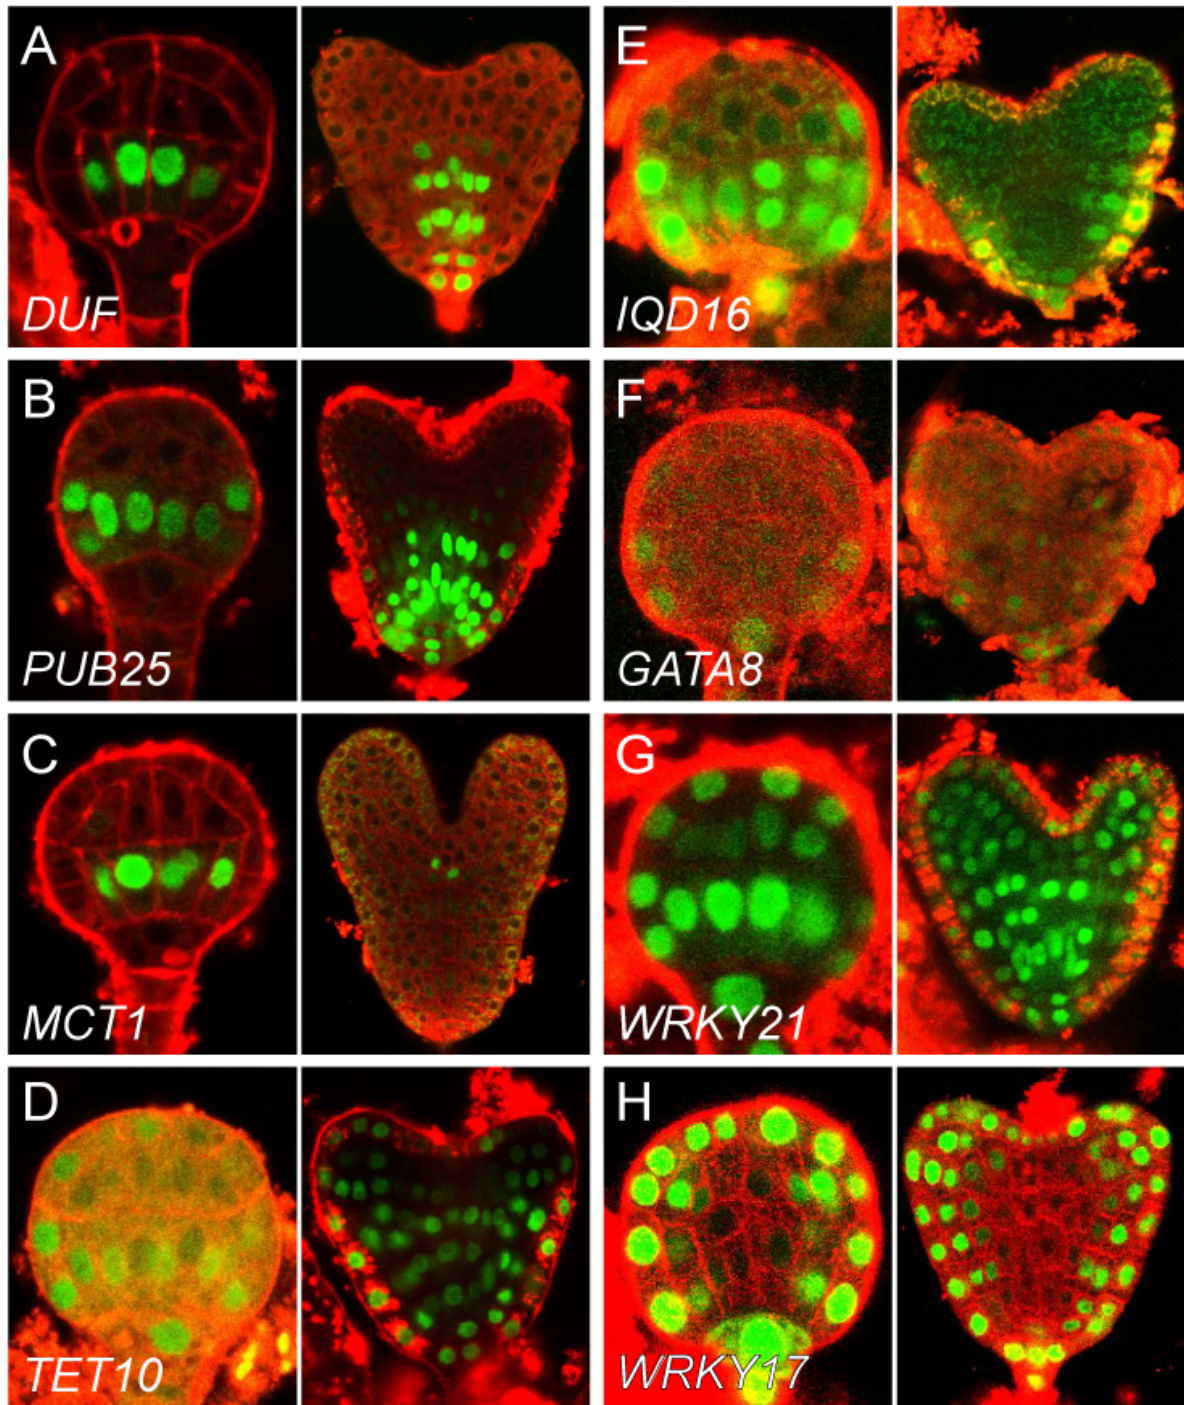

**Supplemental Figure 2: Expression patterns of genes downregulated in globular stage Q0990>>bdl embryos**

Expression patterns of transcriptional nuclear 3GFP reporter lines of *DUF/At1g05577* (A), *PUB25/At3g19380* (B), *MCT1/At1g37140* (C), *TET10/At1g63260* (D), *IQD16/At4g10640* (E), *GATA8/At3g54810* (F), *WRKY21/At2g30590* (G), *WRKY17/At2g24570* (H) genes in globular (left panel) and heart (right panel) stage embryos. Red counterstaining is FM4-64.

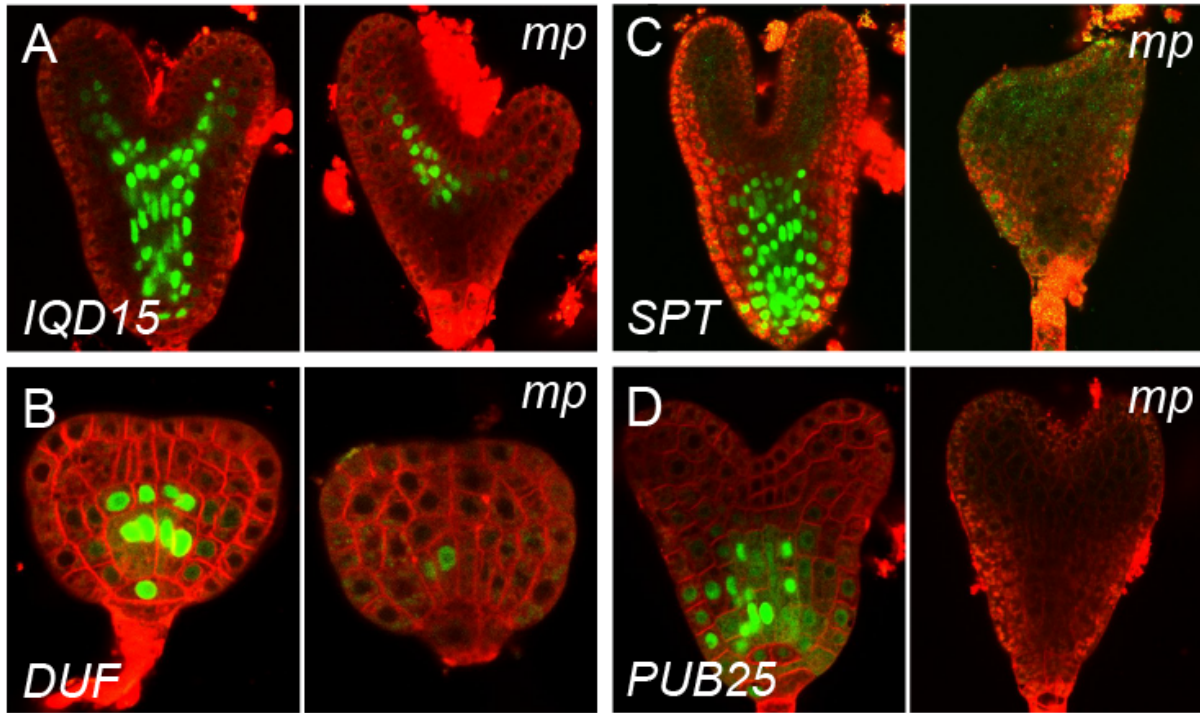

**Supplemental Figure 3: Expression patterns of MP-dependent genes downregulated in globular stage Q0990>>bd1 embryos**

Expression patterns of transcriptional nuclear 3xGFP reporter lines of MP target genes in heart stage (A,C,D) or transition stage (B) wild-type and *mp* embryos. Images were taken at identical imaging settings. Red counterstaining is FM4-64.

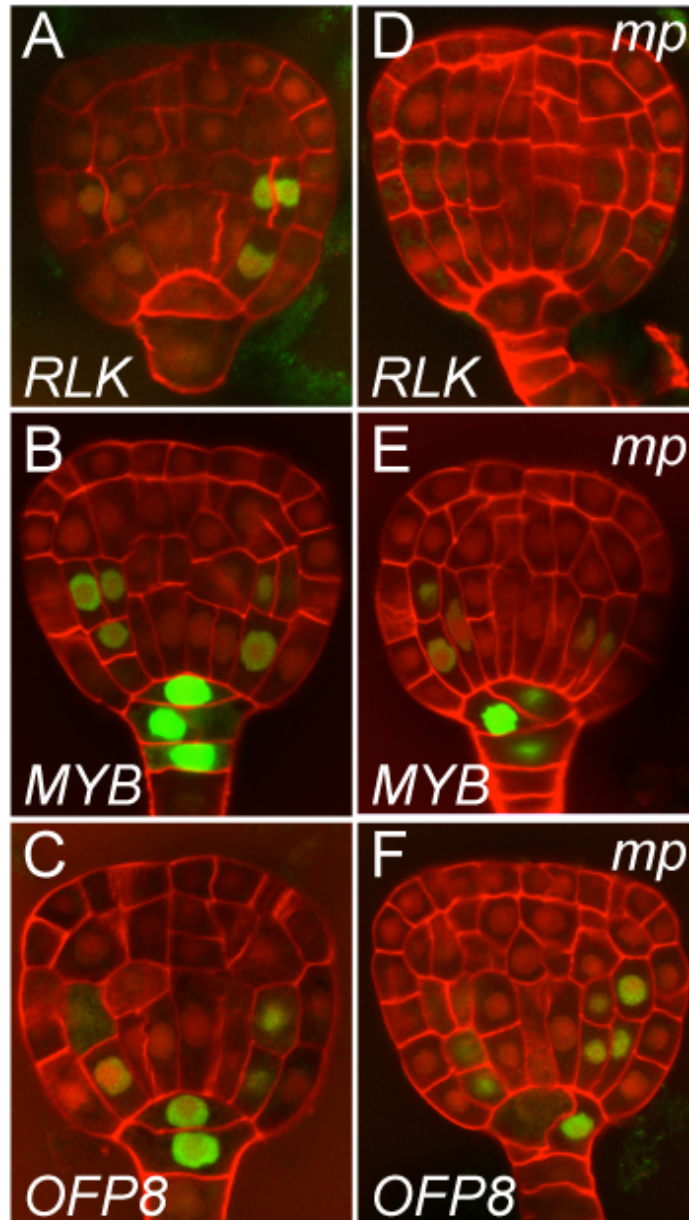

**Supplemental Figure 4: Expression patterns of ground tissue-expressed genes down-regulated in globular stage Q0990>>bd1 embryos**

Expression of promoter-n3GFP reporters for *RLK/At1g70250* (A,D), *MYB/At2g42660* (B,E) and *OFP8/At5g19650* (C,f) genes. Images show expression in globular stage wild-type (A,B,C) and *mp* mutant (D,E,F) embryos and were taken at identical imaging settings. Red counterstaining is Renaissance RS2200.

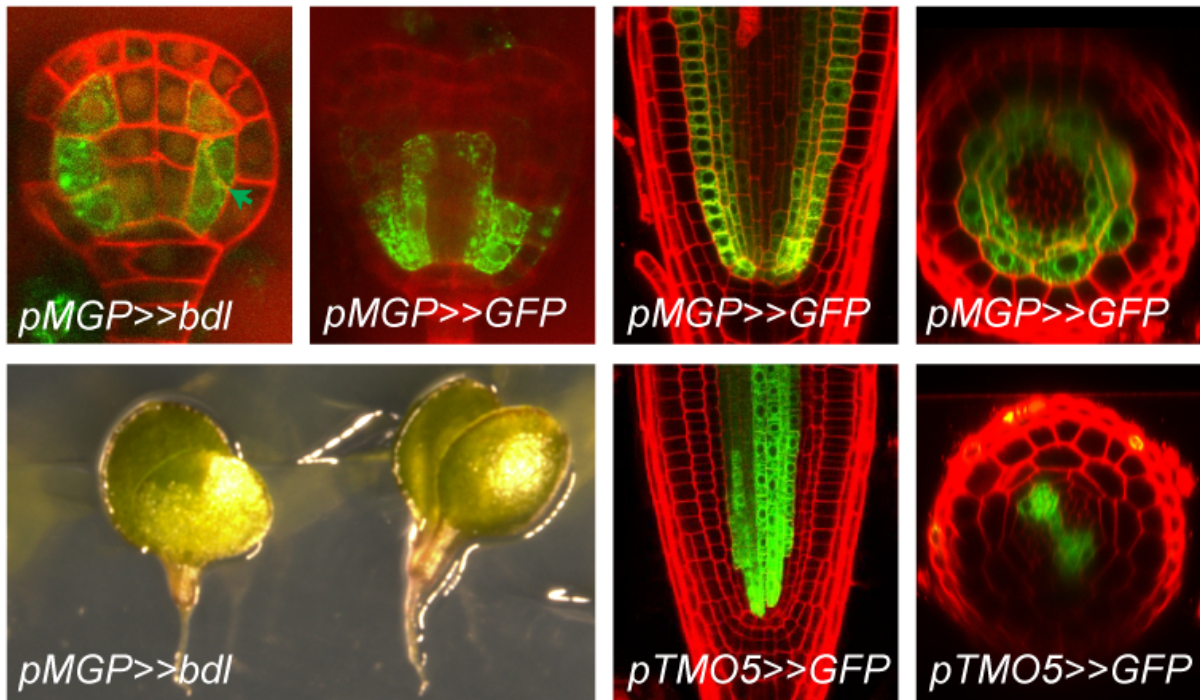

**Supplemental Figure 5: Tools for tissue-specific *bdl* misexpression**

*pMGP>>bdl* expression induces altered cell division orientation in the globular stage ground tissue precursors (green arrow). The *pMGP>>GFP* driver is expressed in a broader domain during transition stage and post-embryonically. *pMGP>>bdl* seedlings are rootless. The *pTMO5>>GFP* driver is specific to the xylem domain in the post-embryonic root tip.

**Table S1: List of significantly downregulated genes in the *Q0990>>bdl* microarray on globular stage embryos.** List of at least two-fold downregulated genes from a microarray on globular stage embryos in which MP activity was locally inhibited in the inner basal embryo cells that will acquire vascular and ground tissue identity, using the *Q0990>>bdl* two component system. The list shows genes that are significantly downregulated in all four replicates ( $q \leq 0,05$ ). Below the bold line are genes that were less than two-fold downregulated or downregulated in less than four replicates. The same experiment was performed with heart stage embryos. For each gene, the fold change in early globular stage embryos (FC glob) and in heart stage embryos (FC heart) is shown. Gene functions were categorized as transcription factors (TF), cell wall remodelling genes (CW), genes involved in signaling (S), degradation (D), cell cycle (CC), auxin signalling (A), cytokinin activation (CK) and ethylene signalling (ETH). <sup>a</sup>Fold change is not significant (t-test,  $q > 0,05$ ). <sup>b</sup> Only three replicates. <sup>c</sup> Only two replicates, not significantly downregulated. <sup>d</sup> Only one replicate, not significantly downregulated.

| <b>AT number</b> | <b>Gene name</b>                  | <b>Gene function</b> | <b>FC glob</b> | <b>FC heart</b>    |
|------------------|-----------------------------------|----------------------|----------------|--------------------|
| AT1G74500        | TMO7                              | TF                   | -8.80          | -6.46              |
| AT1G05577        | Unknown (DUF)                     |                      | -7.78          | -2.18              |
| AT2G30130        | ASL5 (LBD12)                      | TF                   | -7.11          | -5.98              |
| AT5G34881        | unknown. DUF784                   |                      | -6.53          | 1.67 <sup>a</sup>  |
| AT3G11260        | WOX5                              | TF                   | -5.23          | 1.32 <sup>a</sup>  |
| AT2G29350        | SAG13. alcohol dehydrogenase      |                      | -4.98          | -1.91              |
| AT1G29270        | unknown                           |                      | -4.79          | 1.13 <sup>a</sup>  |
| AT5G59760        | unknown. DUF1635                  |                      | -4.67          | -2.81              |
| AT1G58270        | ZW9                               |                      | -4.29          | 1.32 <sup>a</sup>  |
| AT4G28720        | YUC8                              | A                    | -4.09          | 1.41 <sup>a</sup>  |
| AT2G01420        | PIN4                              | A                    | -4.08          | 1.00               |
| AT2G03830        | RGF8. secreted peptide            | S                    | -3.99          | 1.43 <sup>a</sup>  |
| AT5G47440        | PH/DUF828                         | S                    | -3.92          | 1.09 <sup>a</sup>  |
| AT3G48970        | copper-binding family protein     |                      | -3.45          | 1.45 <sup>a</sup>  |
| AT5G37140        | tRNA-splicing endonuclease        |                      | -3.33          | 1.38 <sup>a</sup>  |
| AT1G56010        | NAC1                              | TF                   | -3.15          | 1.45 <sup>a</sup>  |
| AT1G80840        | WRKY40. class IIa                 | TF                   | -3.12          | 1.01 <sup>a</sup>  |
| AT1G77145        | unknown. DUF506                   |                      | -3.09          | -1.46 <sup>a</sup> |
| AT1G37140        | MCT1                              |                      | -3.03          | 1.29 <sup>a</sup>  |
| AT3G04070        | NAC47                             | TF                   | -3.03          | -1.08 <sup>a</sup> |
| AT5G57760        | unknown protein                   |                      | -3.01          | 1.36 <sup>a</sup>  |
| AT3G19380        | PUB25                             | D                    | -2.96          | -1.87              |
| AT3G56770        | bHLH106/TMO5-LIKE2                | TF                   | -2.96          | -1.16 <sup>a</sup> |
| AT2G01430        | ATHB17                            | TF                   | -2.94          | -1.63              |
| AT2G21050        | LAX2                              | A                    | -2.93          | 1.07 <sup>a</sup>  |
| AT5G60810        | RGF1. secreted peptide            | S                    | -2.91          | -1.19 <sup>a</sup> |
| AT2G37210        | LOG3. cytokinin-activating enzyme | CK                   | -2.84          | -2.77              |
| AT3G13960        | AtGRF5                            | TF                   | -2.83          | -1.11 <sup>a</sup> |
| AT3G13857        | unknown protein                   |                      | -2.81          | -7.09              |
| AT3G26760        | dehydrogenase                     |                      | -2.81          | -2.92              |
| AT2G18500        | OFP7                              | TF                   | -2.81          | 1.48 <sup>a</sup>  |
| AT2G42660        | MYB-LIKE. SHAOKEYF class          | TF                   | -2.79          | -3.00              |
| AT5G06300        | LOG7. cytokinin-activating enzyme | CK                   | -2.78          | -1.56              |
| AT3G52450        | PUB22                             | D                    | -2.78          | -1.20 <sup>a</sup> |
| AT1G76420        | CUC3                              | TF                   | -2.78          | 1.35 <sup>a</sup>  |
| AT4G25390        | kinase                            | S                    | -2.78          | 1.17 <sup>a</sup>  |
| AT1G16220        | PP2C                              | S                    | -2.76          | -1.16 <sup>a</sup> |
| AT5G05340        | peroxidase                        | CW                   | -2.75          | 1.96 <sup>a</sup>  |
| AT1G05370        | Sec14-like protein                |                      | -2.73          | 1.52               |
| AT1G12610        | DDF1 (AP2)                        | TF                   | -2.73          | 1.25 <sup>a</sup>  |
| AT3G17680        | Kinase interacting protein-like   |                      | -2.73          | -3.06              |
| AT5G45480        | unknown. DUF594                   |                      | -2.71          | 1.14 <sup>a</sup>  |
| AT4G37650        | SHR                               | TF                   | -2.68          | -2.26              |
| AT4G37810        | unknown                           |                      | -2.68          | 1.30 <sup>a</sup>  |
| AT5G15340        | PPR containing protein            |                      | -2.68          | 1.46 <sup>a</sup>  |
| AT5G28720        | unknown                           |                      | -2.62          | 1.00 <sup>a</sup>  |
| AT3G45450        | Protease chaperone-like           | D                    | -2.59          | 1.21 <sup>a</sup>  |
| AT5G36960        | unknown                           |                      | -2.59          | -1.05 <sup>a</sup> |
| AT1G03220        | Extracellular peptidase           | CW                   | -2.56          | -1.33 <sup>a</sup> |
| AT5G54020        | DC1-domain Zn-finger              | S                    | -2.56          | -1.41 <sup>a</sup> |
| AT2G35080        | Aminoacyl tRNA synthetase         |                      | -2.54          | -2.03              |
| AT1G78860        | Lectin                            | CW                   | -2.54          | -3.59              |
| AT4G17240        | unknown                           |                      | -2.53          | 1.13 <sup>a</sup>  |
| AT3G54920        | PMR6. pectate lyase               | CW                   | -2.53          | 1.19 <sup>a</sup>  |
| AT5G67390        | unknown                           |                      | -2.53          | -1.58              |
| AT5G19650        | OFP8                              | TF                   | -2.52          | -1.76              |
| AT1G03840        | MGP                               | TF                   | -2.50          | -1.95              |
| AT2G23050        | NPY4                              | A                    | -2.45          | -3.35              |
| AT5G28640        | AN3 (GIF)                         | TF                   | -2.44          | 1.04 <sup>a</sup>  |
| AT1G02810        | pectinesterase                    | CW                   | -2.44          | -3.00              |
| At3g08030        | unknown. DUF642                   | CW                   | -2.41          | 1.00               |
| AT4G32800        | TINY-LIKE (AP2)                   | TF                   | -2.39          | 1.50 <sup>a</sup>  |
| AT3G62100        | IAA30                             | TF/A                 | -2.39          | -1.25 <sup>a</sup> |

|           |                                   |      |       |                    |
|-----------|-----------------------------------|------|-------|--------------------|
| AT3G57010 | strictosidine synthase            |      | -2.38 | -1.72              |
| AT4G02290 | AtGH9B13 glycosyl hydrolase       | CW   | -2.37 | -1.63              |
| AT5G48940 | RCH1_LRR-kinase                   | S    | -2.37 | -4.91              |
| AT1G63260 | TET10                             |      | -2.36 | -1.14 <sup>a</sup> |
| AT5G48130 | NPH3-like BTB-POZ                 | D/S  | -2.35 | -4.13              |
| AT5G59790 | unknown, DUF966                   |      | -2.35 | -2.55              |
| AT5G51450 | RIN3_ubiquitin ligase             | D    | -2.34 | 1.14 <sup>a</sup>  |
| AT4G32540 | YUC1                              | A    | -2.33 | 1.15 <sup>a</sup>  |
| AT4G22860 | unknown                           |      | -2.33 | 1.24 <sup>a</sup>  |
| AT5G40630 | ubiquitin                         | D    | -2.32 | -2.04              |
| AT3G25100 | CDC45                             | CC   | -2.31 | 1.33 <sup>a</sup>  |
| AT2G27240 | unknown                           |      | -2.30 | 1.40 <sup>a</sup>  |
| AT1G70560 | TAA1                              | A    | -2.30 | -1.19 <sup>a</sup> |
| AT4G10640 | IOD16                             | TF   | -2.29 | -1.82              |
| AT2G45340 | LRR_RLK_LRR-IV                    | S    | -2.29 | -1.29 <sup>a</sup> |
| AT1G01480 | ACS2_ACC synthase                 | ETH  | -2.28 | 1.06 <sup>a</sup>  |
| AT2G28550 | TOE1 (AP2)                        | TF   | -2.28 | 1.24 <sup>a</sup>  |
| AT2G44660 | Glycosyltransferase               | CW   | -2.28 | 1.66 <sup>a</sup>  |
| AT3G62060 | Pectinacetylesterase              | CW   | -2.27 | 1.25 <sup>a</sup>  |
| AT3G17840 | ORK1_RLK_LRR-III                  | S    | -2.27 | 1.01 <sup>a</sup>  |
| AT2G34700 | Extensin                          | CW   | -2.24 | 1.25 <sup>a</sup>  |
| AT3G59200 | LRR-F-box gene                    | D    | -2.23 | -1.05 <sup>a</sup> |
| AT2G45720 | armadillo/beta-catenin repeat     | S    | -2.23 | 1.17 <sup>a</sup>  |
| AT1G33750 | terpene synthase                  |      | -2.23 | -2.38              |
| AT2G18340 | LEA domain                        |      | -2.23 | -3.23              |
| AT2G25980 | iacalin lectin                    | CW   | -2.21 | -5.03              |
| AT2G06850 | EXGT-A1_hydrolase                 | CW   | -2.20 | -1.35 <sup>a</sup> |
| AT4G25240 | SKS1_oxidoreductase               | CW   | -2.20 | 1.16 <sup>a</sup>  |
| AT3G16490 | IOD26                             | TF   | -2.20 | 1.08 <sup>a</sup>  |
| AT4G29360 | glycosyl hydrolase                | CW   | -2.19 | 1.14 <sup>a</sup>  |
| AT1G28400 | unknown                           |      | -2.19 | -1.87              |
| AT1G18250 | ATLP-1_thaumatococcus-like        |      | -2.19 | 1.13 <sup>a</sup>  |
| AT3G16190 | isochorismatase hydrolase         |      | -2.18 | 1.21 <sup>a</sup>  |
| AT3G15170 | CUC1                              | TF   | -2.18 | 1.63               |
| AT5G35770 | SAP                               | TF   | -2.18 | -1.01 <sup>a</sup> |
| AT5G22860 | serine carboxypeptidase           | D/S  | -2.17 | 1.26 <sup>a</sup>  |
| AT1G53860 | remorin                           |      | -2.17 | -1.17 <sup>a</sup> |
| AT4G37390 | BRU6_GH3-2                        | A    | -2.16 | 1.13 <sup>a</sup>  |
| AT3G24650 | ABI3                              | TF   | -2.16 | 1.08 <sup>a</sup>  |
| AT4G03292 | nucleic acid binding              | TF   | -2.16 | 1.29 <sup>a</sup>  |
| AT2G18380 | HANL1 (GATA20)                    | TF   | -2.15 | -1.13 <sup>a</sup> |
| AT5G10520 | RBK1_Rop-binding kinase           | S    | -2.15 | 1.41 <sup>a</sup>  |
| AT2G47930 | AGP26                             | CW   | -2.14 | 1.11 <sup>a</sup>  |
| AT3G17970 | atToc64-III                       |      | -2.13 | 1.41 <sup>a</sup>  |
| AT4G31150 | endonuclease                      |      | -2.13 | 1.44 <sup>a</sup>  |
| AT2G17860 | pathogenesis-related thaumatin    |      | -2.13 | 1.19 <sup>a</sup>  |
| AT3G15720 | glycoside hydrolase               | CW   | -2.13 | -2.28              |
| AT1G23000 | heavy-metal-associated domain     |      | -2.12 | 1.21 <sup>a</sup>  |
| AT2G34650 | PID                               | A    | -2.11 | -1.24 <sup>a</sup> |
| AT4G10630 | glutaredoxin                      |      | -2.11 | 1.10 <sup>a</sup>  |
| AT5G02070 | kinase-related                    | S    | -2.11 | 1.09 <sup>a</sup>  |
| AT5G48500 | unknown protein                   |      | -2.10 | -1.36 <sup>a</sup> |
| AT4G19560 | CYCT1                             | CC   | -2.10 | 1.07 <sup>a</sup>  |
| AT1G62420 | Unknown, DUF506                   |      | -2.09 | -1.74              |
| AT1G11130 | SUB (RLK)                         | K/S  | -2.09 | 1.03 <sup>a</sup>  |
| AT3G15540 | IAA19                             | TF/A | -2.09 | -2.78              |
| AT3G17200 | LTR Reverse Transcriptase-Like    |      | -2.09 | 1.24 <sup>a</sup>  |
| AT2G45190 | FIL/YAB1                          | TF   | -2.09 | 1.44 <sup>a</sup>  |
| AT4G22010 | SKS4_oxidoreductase               | CW   | -2.08 | 1.12 <sup>a</sup>  |
| AT2G32280 | unknown                           |      | -2.08 | 1.26 <sup>a</sup>  |
| AT1G63100 | SCL28                             | TF   | -2.08 | 1.08 <sup>a</sup>  |
| AT5G28646 | WVD2_Microtubule-binding          | S    | -2.08 | -1.74              |
| AT5G50890 | lipase                            |      | -2.08 | -1.02 <sup>a</sup> |
| AT5G43810 | ZLL                               | S    | -2.07 | -1.09 <sup>a</sup> |
| AT1G14440 | AtHB31                            | TF   | -2.07 | 1.55               |
| AT1G34030 | 40S ribosomal protein S18         |      | -2.06 | 1.18 <sup>a</sup>  |
| AT2G20515 | unknown                           |      | -2.06 | -4.49              |
| AT5G50915 | bHLH137                           | TF   | -2.06 | 1.42 <sup>a</sup>  |
| AT1G28110 | SCPL45_carboxypeptidase           | CW   | -2.05 | -2.32              |
| AT4G07825 | unknown                           |      | -2.05 | 1.12 <sup>a</sup>  |
| AT4G23950 | Galactose-binding like            | CW   | -2.04 | 1.28 <sup>a</sup>  |
| AT4G00390 | GeBP-like transe. regulator       | TF   | -2.04 | -1.51 <sup>a</sup> |
| AT4G28100 | GPI-anchored protein              | CW   | -2.04 | 1.26 <sup>a</sup>  |
| AT5G62890 | AtNAT6_ascorbate transporter      |      | -2.04 | -1.01 <sup>a</sup> |
| AT2G28510 | TMO6-LIKE2 (Dof2.1)               | TF   | -2.03 | 1.99               |
| AT5G55480 | SVL1_phosphoric diester hydrolase |      | -2.03 | 1.01 <sup>a</sup>  |
| AT5G01910 | mannase                           | CW   | -2.02 | 1.26 <sup>a</sup>  |
| AT2G28790 | osmotin-like                      |      | -2.02 | -1.18 <sup>a</sup> |
| AT5G47230 | ERF5 (AP2)                        | TF   | -2.02 | -1.65              |
| AT1G04670 | unknown                           |      | -2.01 | -1.11 <sup>a</sup> |
| AT1G70510 | KNAT2                             | TF   | -2.01 | -3.80              |
| AT3G29300 | unknown                           |      | -2.00 | 1.04 <sup>a</sup>  |



|           |                            |    |                    |                    |
|-----------|----------------------------|----|--------------------|--------------------|
| AT3G16130 | ROP-GEF13                  |    | -10.4 <sup>c</sup> | 1.59 <sup>a</sup>  |
| AT1G25310 | MEE8 (bHLH108)             | TF | -9.67 <sup>d</sup> | -1.02 <sup>a</sup> |
| AT1G77730 | pleckstrin homology domain |    | -8.13 <sup>c</sup> | -1.58 <sup>a</sup> |
| AT1G67520 | lectin kinase              |    | -6.17 <sup>c</sup> | -2.33 <sup>a</sup> |
| AT1G32770 | NAC12                      | TF | -6.05 <sup>c</sup> | -1.02 <sup>a</sup> |
| AT2G24430 | NAC38                      | TF | -4.36 <sup>d</sup> | 1.01 <sup>a</sup>  |
| AT1G70250 | thaumatin-like RLK         | S  | -4.21 <sup>c</sup> | 2.36 <sup>a</sup>  |
| AT1G56030 | Ubiquitin ligase           | D  | -3.80 <sup>c</sup> | -2.40 <sup>a</sup> |
| AT5G44460 | CML43                      | S  | -3.60 <sup>c</sup> | 3.98 <sup>a</sup>  |
| AT3G49380 | IOD15                      | TF | -3.12 <sup>b</sup> | -1.88              |
| AT3G54810 | BME3 (GATA8)               | TF | -2.79 <sup>c</sup> | 1.44 <sup>a</sup>  |
| AT4G33880 | bHLH85                     | TF | -2.75 <sup>c</sup> | -1.50              |
| AT2G31215 | bHLH138                    | TF | -2.44 <sup>c</sup> | 1.20 <sup>a</sup>  |
| AT4G36930 | SPT (bHLH24)               | TF | -1.73              | -1.19 <sup>a</sup> |
| AT2G30590 | WRKY21. class II d         | TF | -1.72              | -2.00              |
| AT2G24570 | WRKY17. class II d         | TF | -1.69              | -1.28 <sup>a</sup> |
| AT4G39410 | WRKY13. class II c         | TF | -1.68 <sup>a</sup> | -1.22 <sup>a</sup> |
| AT4G00210 | LBD31                      | TF | -1.63              | -1.25 <sup>a</sup> |

**Table S2: Expression pattern analysis of putative MP target genes involved in root initiation.**

Schematic overview of embryo and root expression analysis of 37 putative MP target genes. \* Expression in apical embryo region. <sup>a</sup> Expression in L1 layer SAM. <sup>b</sup> No expression in root meristem but expression in differentiation zone of the root. <sup>c</sup> Only lateral root cap and/or columella expression. <sup>d</sup> Weak expression in root meristem and stronger expression in differentiation zone. <sup>e</sup> Very strong expression in vasculature of the root meristem. N.a., not analyzed. Var, variable expression patterns between independently transformed lines of the same construct.

| AT number                                                                          | Gene name                 | Observed expression pattern in the embryo |     |      |    |             |     |    |                  | Expression observed in postembryonic root meristem? |
|------------------------------------------------------------------------------------|---------------------------|-------------------------------------------|-----|------|----|-------------|-----|----|------------------|-----------------------------------------------------|
|                                                                                    |                           | Globular stage                            |     |      |    | Heart stage |     |    |                  |                                                     |
|                                                                                    |                           | hyp                                       | VSC | GS C | ep | qc          | vas | gt | ep               |                                                     |
| <b>A. Ubiquitous expression in globular stage embryo</b>                           |                           |                                           |     |      |    |             |     |    |                  |                                                     |
| AT1G63260                                                                          | <i>TET10</i>              | X                                         | X   | X    | X  | X           | X   | X  | X                | n.a.                                                |
| AT2G30590                                                                          | <i>WRKY21</i>             | X                                         | X   | X    | X  | X           | X   | X  | X                | X                                                   |
| <b>B. Expression in VSC and GSC of globular stage embryo</b>                       |                           |                                           |     |      |    |             |     |    |                  |                                                     |
| AT1G37140                                                                          | <i>MCT1</i>               |                                           | X   | X    |    |             |     |    |                  | ?                                                   |
| AT3G19380                                                                          | <i>PUB25</i>              | X                                         | X   | X    | X  | X           | X   | X  | X                | X                                                   |
| AT4G36930                                                                          | <i>SPT (bHLH24)</i>       |                                           | X   | X    | X  | X           | X   | X  | X                | X                                                   |
| <b>C. Expression in VSC of globular stage embryo</b>                               |                           |                                           |     |      |    |             |     |    |                  |                                                     |
| AT1G05577                                                                          | <i>DUF</i>                |                                           | X   |      |    | X           | X   |    |                  | X                                                   |
| AT3G49380                                                                          | <i>IQD15</i>              |                                           | X   |      |    | X           | X   |    |                  | X                                                   |
| <b>D. Expression in GSC of globular stage embryo</b>                               |                           |                                           |     |      |    |             |     |    |                  |                                                     |
| AT2G42660                                                                          | <i>MYB-LIKE</i>           | X                                         |     | X    |    | X           |     | X  |                  | X                                                   |
| AT5G19650                                                                          | <i>OFP8</i>               | X                                         |     | X    |    | X           |     | X  |                  | X                                                   |
| AT1G70250                                                                          | thaumatin-like <i>RLK</i> |                                           |     | X    |    |             |     | X  |                  | X                                                   |
| <b>E. Expression in hypophysis and epidermis</b>                                   |                           |                                           |     |      |    |             |     |    |                  |                                                     |
| AT3G54810                                                                          | <i>GATA8</i>              | X                                         |     |      | X  |             |     |    | X                | X                                                   |
| AT4G10640                                                                          | <i>IQD16</i>              | X                                         | X   | X    | X  | X           |     |    | X                | n.a.                                                |
| AT3G52450                                                                          | <i>PUB22</i>              | X                                         |     |      | X  | X           |     |    | X                | X                                                   |
| AT2G24570                                                                          | <i>WRKY17</i>             | X                                         |     | X    | X  | X           |     | X  | X                | X                                                   |
| <b>F. Expression in apical embryo region</b>                                       |                           |                                           |     |      |    |             |     |    |                  |                                                     |
| AT1G14440                                                                          | <i>ATHB31</i>             |                                           |     |      | X* |             | X*  |    | X*               | n.a.                                                |
| AT2G28510                                                                          | <i>Dof2.1</i>             |                                           |     |      |    |             | X*  |    |                  | X                                                   |
| AT1G70510                                                                          | <i>KNAT2</i>              |                                           |     |      |    |             |     |    | X** <sup>a</sup> | no                                                  |
| AT4G00210                                                                          | <i>LBD31</i>              |                                           |     |      |    |             |     |    | X*               | X                                                   |
| <b>G. Expression in differentiated columella cells of the torpedo stage embryo</b> |                           |                                           |     |      |    |             |     |    |                  |                                                     |
| AT4G28720                                                                          | <i>YUCCA8</i>             |                                           |     |      |    |             |     |    |                  | X <sup>c</sup>                                      |
| <b>H. Variable embryo expression among independently transformed plant lines</b>   |                           |                                           |     |      |    |             |     |    |                  |                                                     |
| AT4G33880                                                                          | <i>bHLH85</i>             | Variable expression pattern               |     |      |    |             |     |    |                  | X                                                   |
| AT5G50915                                                                          | <i>bLH137</i>             | Variable expression pattern               |     |      |    |             |     |    |                  | ?                                                   |
| AT2G31215                                                                          | <i>bHLH138</i>            | Variable expression pattern               |     |      |    |             |     |    |                  | no                                                  |
| AT3G04070                                                                          | <i>NAC47</i>              | Variable expression pattern               |     |      |    |             |     |    |                  | X <sup>d</sup>                                      |
| <b>I. No embryo expression observed</b>                                            |                           |                                           |     |      |    |             |     |    |                  |                                                     |
| AT5G44460                                                                          | <i>CML43</i>              | No expression                             |     |      |    |             |     |    |                  | X                                                   |
| AT1G12610                                                                          | <i>DDF1</i>               | No expression                             |     |      |    |             |     |    |                  | no                                                  |
| AT5G47230                                                                          | <i>ERF5</i>               | No expression                             |     |      |    |             |     |    |                  | var                                                 |
| AT2G30130                                                                          | <i>LBD12</i>              | No expression                             |     |      |    |             |     |    |                  | X <sup>e</sup>                                      |
| AT1G67520                                                                          | Lectin kinase             | No expression                             |     |      |    |             |     |    |                  | X <sup>e</sup>                                      |
| AT1G25310                                                                          | <i>MEE8 (bHLH108)</i>     | No expression                             |     |      |    |             |     |    |                  | n.a.                                                |
| AT1G32770                                                                          | <i>NAC12</i>              | No expression                             |     |      |    |             |     |    |                  | no <sup>b</sup>                                     |
| AT2G24430                                                                          | <i>NAC38</i>              | No expression                             |     |      |    |             |     |    |                  | no                                                  |
| AT2G18500                                                                          | <i>OFP7</i>               | No expression                             |     |      |    |             |     |    |                  | X <sup>d</sup>                                      |
| AT1G77730                                                                          | PH domain                 | No expression                             |     |      |    |             |     |    |                  | var                                                 |
| AT3G16130                                                                          | <i>ROP-GEF13</i>          | n.a.                                      |     |      |    |             |     |    |                  | no                                                  |
| AT1G56030                                                                          | Ubiquitin ligase          | No expression                             |     |      |    |             |     |    |                  | no <sup>b</sup>                                     |
| AT4G39410                                                                          | <i>WRKY13</i>             | No expression                             |     |      |    |             |     |    |                  | no <sup>b</sup>                                     |
| AT1G80840                                                                          | <i>WRKY40</i>             | No expression                             |     |      |    |             |     |    |                  | n.a.                                                |

**Table S3: Primers used for cloning.**

| AT number | Gene name                    | Forward and reverse primer used for LIC cloning                                        |
|-----------|------------------------------|----------------------------------------------------------------------------------------|
| AT1G14440 | <i>ATHB31</i>                | TAGTTGGAATGGGTTTCGAAAACACATAACTTTTCGATCCT<br>TTATGGAGTTGGGTTTCAACTTTTTTAATGGGTCTTCT    |
| AT4G33880 | <i>bHLH85</i>                | TAGTTGGAATGGGTTTCAATTTATCCATGGAACCTTG<br>TTATGGAGTTGGGTTTCAATTTATATGTTTTGTAACT         |
| AT5G50915 | <i>bLH137</i>                | TAGTTGGAATGGGTTTCAATCTTAGAGTGAAGTAATGTA<br>TTATGGAGTTGGGTTTCAAGAGAGAAGATTAAGGACTTG     |
| AT2G31215 | <i>bHLH138</i>               | TAGTTGGAATGGGTTTCAATTTGTCAGAAGAAGAAGATC<br>TTATGGAGTTGGGTTTCAAGAAGATGGTTCAATACTCTA     |
| AT5G44460 | <i>CML43</i>                 | TAGTTGGAATGGGTTTCGAAAACATGTAAATTTTCATCGA<br>TTATGGAGTTGGGTTTCAATGTTACTCTTCTTCTAGTT     |
| AT1G12610 | <i>DDF1</i>                  | TAGTTGGAATGGGTTTCAAGTTTTGAACAAAATAATCTTAAC<br>TTATGGAGTTGGGTTTCGAAAACCAAAGTACCAAAAATTC |
| AT2G28510 | <i>Dof2.1</i>                | TAGTTGGAATGGGTTTCAAGCAAGCTCGCTCATTTCG<br>TTATGGAGTTGGGTTTCAACCATGTAACAAAGGATCGAA       |
| AT1G05577 | <i>DUF966</i>                | TAGTTGGAATGGGTTTCAACGTTCCGTGGTGAATCAATG<br>TTATGGAGTTGGGTTTCAACTCTCTTTCTTTTTGTTTGGTCT  |
| AT5G47230 | <i>ERF5</i>                  | TAGTTGGAATGGGTTTCAATCTCTGATTTGCTATATCAT<br>TTATGGAGTTGGGTTTCAATGATAAAAATTTTCAAAAAGC    |
| AT3G54810 | <i>GATA8</i>                 | TAGTTGGAATGGGTTTCAATTTACACTTTCTTAATTATC<br>TTATGGAGTTGGGTTTCAAGTTTTACAATTATTGCAAGT     |
| AT3G49380 | <i>IQD15</i>                 | TAGTTGGAATGGGTTTCAAGTTTTCGATGGTAATTCTCT<br>TTATGGAGTTGGGTTTCAACAAGATCGATCAACCTCGTC     |
| AT4G10640 | <i>IQD16</i>                 | TAGTTGGAATGGGTTTCAAGATCTACCAAGATCGAACAA<br>TTATGGAGTTGGGTTTCAAAATGAATTAACGTTTTCTAAAAGC |
| AT1G70510 | <i>KNAT2</i>                 | TAGTTGGAATGGGTTTCAATTTAGTATAGTAATCTCAAA<br>TTATGGAGTTGGGTTTCAATAATGTGATCGTAGTGAGAT     |
| AT2G30130 | <i>LBD12</i>                 | TAGTTGGAATGGGTTTCAATTTACCATGGTTTTGTCTTA<br>TTATGGAGTTGGGTTTCAACTTCTACTATGATCGTGATT     |
| AT4G00210 | <i>LBD31</i>                 | TAGTTGGAATGGGTTTCAATTTCAAAAATATTGAACTT<br>TTATGGAGTTGGGTTTCAACTTTTTATGTCAAAGACGTAA     |
| AT1G67520 | Lectin kinase                | TAGTTGGAATGGGTTTCAAAAACAAAGAACAGAACAGAAAG<br>TTATGGAGTTGGGTTTCAAAAGTTTCAGAAAAGATGGATGA |
| AT1G37140 | <i>MCT1</i>                  | TAGTTGGAATGGGTTTCAAGTTTTATGTTTCATGATGAT<br>TTATGGAGTTGGGTTTCAAGGAAGCTAAAGAAAAGTAGGA    |
| AT1G25310 | <i>MEE8 (bHLH108)</i>        | TAGTTGGAATGGGTTTCAATCTATATGATTTGATTA<br>TTATGGAGTTGGGTTTCAATCTTTTGATAGTTTTAAGTG        |
| AT2G42660 | <i>MYB-LIKE</i>              | TAGTTGGAATGGGTTTCAAAAGGAATTGTGAATGAAGTGT<br>TTATGGAGTTGGGTTTCAAGTCTCTCCGGCGAGAGTGTCTT  |
| AT1G32770 | <i>NAC12</i>                 | TAGTTGGAATGGGTTTCAATCTTCTACATAACGATTTCT<br>TTATGGAGTTGGGTTTCAATAACGAAGATAGCAATATAT     |
| AT2G24430 | <i>NAC38</i>                 | TAGTTGGAATGGGTTTCAATGATTATATATTACGTTTAT<br>TTATGGAGTTGGGTTTCAATTTATATGATCTTTAGTTTA     |
| AT3G04070 | <i>NAC47</i>                 | TAGTTGGAATGGGTTTCAAAAAGAAAACGTTAACTAGATC<br>TTATGGAGTTGGGTTTCAATGTTTAAAGGAATGATATTT    |
| AT2G18500 | <i>OFP7</i>                  | TAGTTGGAATGGGTTTCAATATTTTTAATGATTAACGA<br>TTATGGAGTTGGGTTTCAATTTTTTTCTTTTCTTGTTT       |
| AT5G19650 | <i>OFP8</i>                  | TAGTTGGAATGGGTTTCAAAAGATATTTAGTCTCTTGCTT<br>TTATGGAGTTGGGTTTCAAGTTTATAGAGAATATCGAGAGA  |
| AT1G77730 | PH domain                    | TAGTTGGAATGGGTTTCAAAATTTCTTTCAGATTGTACCAT<br>TTATGGAGTTGGGTTTCAATGTTTGAACGTTTCAAGA     |
| AT3G52450 | <i>PUB22</i>                 | TAGTTGGAATGGGTTTCAACTTGGTCATGATTCTGGTTCG<br>TTATGGAGTTGGGTTTCAATGACCCGCTCGAAAATATGAAAA |
| AT3G19380 | <i>PUB25</i>                 | TAGTTGGAATGGGTTTCAATAAATAGAGACTATTTTCAT<br>TTATGGAGTTGGGTTTCAATAAGAAAAGTTGAGAAAACAGA   |
| AT1G70250 | thaumatin-like<br><i>RLK</i> | TAGTTGGAATGGGTTTCAATCTACCGTCTCTAGCCCTGA<br>TTATGGAGTTGGGTTTCAATTTCTTTCTTGGTAAATGGTAATG |
| AT3G16130 | <i>ROP-GEF13</i>             | TAGTTGGAATGGGTTTCAATCAATAATCCATTAGATATGG<br>TTATGGAGTTGGGTTTCAATTTCCATGATTTTCTTAAATC   |
| AT4G36930 | <i>SPT (bHLH24)</i>          | TAGTTGGAATGGGTTTCAATGCATATGATTACGGAAAC<br>TTATGGAGTTGGGTTTCAATACACCAACAACAAAAAAAAGC    |

|                  |                  |                                                                                                                |
|------------------|------------------|----------------------------------------------------------------------------------------------------------------|
| AT1G63260        | <i>TET10</i>     | TAGTTGGAATGGGTTTCGAAATCTTCACAGTACCGTTTAT<br>TTATGGAGTTGGGTTTCAATTTTTCAAGGTTGTTGCTTT                            |
| AT1G56030        | Ubiquitin ligase | TAGTTGGAATAGGTTTCATGGTGA AAAACTCCTATGTA<br>AGTATGGAGTTGGGTTCTCAACGTCCCAACTCCTCAA                               |
| AT4G39410        | <i>WRKY13</i>    | TAGTTGGAATGGGTTTCGAACTTCTAAATGGATAATGAAA<br>TTATGGAGTTGGGTTTCGAACTCGCAAAAAGCTTGACGAAG                          |
| AT2G24570        | <i>WRKY17</i>    | TAGTTGGAATAGGTTTCATGACCGTTGATATTATGCG<br>AGTATGGAGTTGGGTTCTCAAGCCGAACCAAAACACCA                                |
| AT2G30590        | <i>WRKY21</i>    | TAGTTGGAATGGGTTTCGAACCAATATCTAGTATTGGA<br>TTATGGAGTTGGGTTTCGAACTAAGAACCCTAATTTTTTC                             |
| AT1G80840        | <i>WRKY40</i>    | TAGTTGGAATGGGTTTCGAAAATTCGAATATCAAATATAA<br>TTATGGAGTTGGGTTTCGAAGTAAATATATGTAGGATGAA                           |
| AT4G28720        | <i>YUCCA8</i>    | TAGTTGGAATGGGTTTCGAATATAATTTTTCTCTAATAT<br>TTATGGAGTTGGGTTTCGAATCTTTTTTTATAAGTTTCTT                            |
| AT4G37650        | <i>SHR*</i>      | TAGTTGGAATGGGTTTCGAAGCATAACAGGCATGCATAACAAC<br>TTATGGAGTTGGGTTTCGAAGACTGACTAGTCTAAAGAGAGTATCCGTTTT             |
| AT2G45160        | <i>SCL27</i>     | TAGTTGGAATGGGTTTCGAAGCGTGATCCATGTTATGTCATCGAG<br>TTATGGAGTTGGGTTTCGAACGCTCCTCAACACACAGAGTAAC                   |
| AT1G63100        | <i>SCL28</i>     | TAGTTGGAATGGGTTTCGAATTTAGTCTAGTGATTAACCTA<br>TTATGGAGTTGGGTTTCGAACCTCTACAAAATCTACCTAA                          |
| AT3G13840        | <i>SCL29</i>     | TAGTTGGAATGGGTTTCGAAGTTCGAGTGCCTTGTCGGATTCTTC<br>TTATGGAGTTGGGTTTCGAATGAATAGATGATGAAAAAGGTATAATTTGTGA<br>GTAGG |
| AT1G07520        | <i>SCL31</i>     | TAGTTGGAATGGGTTTCGAACTGTTGATAGTCTCTCGCCAACACG<br>TTATGGAGTTGGGTTTCGAACCAACCTGAGTAATTCGATTCTTCGTCC              |
| AT3G49950        | <i>SCL32</i>     | TAGTTGGAATGGGTTTCGAACGAACATGCCCTTATACGACAATTTGAGGCC<br>TTATGGAGTTGGGTTTCGAATTGAGTCTGGTTTTAGAGAGAAATGTACG       |
| <b>AT number</b> | <b>Gene name</b> | <b>Forward and reverse primer used for cloning</b>                                                             |
| AT1G03840        | <i>MGP</i>       | AGGGCCCGGGTAATATGT<br>AAAGGATCCGAGATGGAGATG                                                                    |
| AT3G25710        | <i>TMO5</i>      | GTTGAACGTCGTGGGCTTC<br>AACCGGATCCTTTTTGGTTTTT                                                                  |

## Experimental Procedures

### Genetic stocks

All plants were grown at 22°C under long day (16 hour) illumination. The *mpB4149* allele in Utrecht background and the *UAS::bdl* line were described in (1). The *mpS319* allele corresponds to SALK\_021319. The *Q0990* enhancer trap line was generated by Jim Haseloff (University of Cambridge, UK) and obtained through the Arabidopsis Biological Resource Center (ABRC). The *shr-2* mutant was described in (2) and obtained from dr. Ikram Blilou. The *scr scz* mutant was described in (3) and obtained from dr. Liam Dolan. The pSHR:SHR-YFP and pSCR:YFP lines were described in (4) and obtained from dr. Ikram Blilou. *R2D2* and *DR5v2* reporters were described in (5).

### Transgenic constructs

Transcriptional fusions were generated by PCR-amplifying 2 kb fragments upstream of the ATG from genomic DNA using Phusion Flash polymerase (Finnzymes), and introducing them into the pGreenIIKAN:LIC:SV40:3GFP:NOS (pPLV04) or pGreenIIKAN:LIC:SV40:tdTomato:NOS (pPLV11) vector using Ligation-Independent Cloning (6). Primers used for amplifying promoter fragments are listed in Table S3. All promoter fusion constructs were transformed into wild-type and *mpB4149* heterozygous plants by simplified floral dipping (6) using the *Agrobacterium* strain GV3101 (pSoup). For the *MGP* and *TMO5* promoter driver constructs, a 2.5 kb fragment upstream of the *MGP* gene and a 2.3 kb fragment upstream of the *TMO5* gene, respectively, was cloned in front of a GAL4VP16 transcriptional activator gene in the pGreen vector carrying a kanamycin-resistance cassette (7).

### Microarray experiment

*Q0990* plants were crossed to *UAS::bdl* plants to locally inhibit ARF activity in the embryo and to Columbia-0 wild-type plants to serve as a control. After three and six days, embryos from both crosses were separately isolated as described in (8) using a dissecting microscope and fine forceps (Dumont 55 forceps, catalog no. 11295-55, Fine Science Tools). Total RNA was extracted from pooled embryos (300-400 embryos for each biological replicate) following the protocol of RNAqueous-micro kit (Ambion, catalog no. 1927). Each biological replicate contained 300-400 isolated embryos.

The mRNA was subsequently amplified prior to labeling to increase the quantity as described in [S7]. Antisense RNA labeling was performed following the protocol of (9). The mRNA samples representing four biological replicates from experimental and control samples were labeled (two Cy3 and two Cy5) and hybridized to the microarray slides following the protocol described in <http://ag.arizona.edu/microarray>. The Arabidopsis 70-mer oligo array slides prepared by University of Arizona were used in all the microarray experiments (version ATV 3.7.2; <http://ag.arizona.edu/microarray>). Hybridized slides were scanned sequentially for Cy3- and Cy5-labeled mRNA targets with a ScanArray 4000 laser scanner at a resolution of 10 μm. The image analysis and signal quantification were performed using the QuantArray program (GSI Lumonics). Limma Software (10) was used to normalize and to determine the modulated genes from microarray data. Microarray data have been deposited to the NCBI Gene Expression Omnibus (Accession number GSE78695).

### Microscopy

Differential interference contrast (DIC) microscopy was performed as described previously [S6], using a Leica DMR microscope. Basic Fuchsin staining was performed as described in (11). Microscopy was performed either on a Zeiss LSM510 confocal microscope or a Leica SP5/II equipped with HyD detectors. Membranes were counterstained using FM4-64 dye (Invitrogen). Alternatively, cell walls were stained with SCR1 Renaissance 2200 (R2200; Renaissance Chemicals, UK). Both stains are visible as red signal in confocal images.

## Supplemental References

1. Weijers, D., Schlereth, A.S., Ehrismann, J.S., Schwank, G., Kientz, M., and Jürgens, G. (2006). Auxin triggers transient local signaling for cell specification in Arabidopsis embryogenesis. *Dev. Cell* *10*, 265-270.
2. Benfey, P.N., Linstead, P.J., Roberts, K., Schiefelbein, J.W., Hauser, M.T., and Aeschbacher, R.A. (1993). Root development in Arabidopsis: four mutants with dramatically altered root morphogenesis. *Development* *119*, 57-70.
3. Pernas, M., Ryan, E., and Dolan, L. (2010). SCHIZORIZA Controls Tissue System Complexity in Plants. *Current Biology* *20*, 818-823.
4. Long, Y., Smet, W., Cruz-Ramírez, A., Castelijns, B., de Jonge, W., Mähönen, A.P., Bouchet, B.P., Perez, G.S., Akhmanova, A., Scheres, B., et al. (2015). Arabidopsis BIRD Zinc Finger Proteins Jointly

- Stabilize Tissue Boundaries by Confining the Cell Fate Regulator SHORT-ROOT and Contributing to Fate Specification. *The Plant Cell* 27, 1185-1199.
5. Liao, C.-Y., Smet, W., Brunoud, G., Yoshida, S., Vernoux, T., and Weijers, D. (2015). Reporters for sensitive and quantitative measurement of auxin response. *Nat Meth* 12, 207-210.
  6. De Rybel, B., van den Berg, W., Lokerse, A.S., Liao, C.-Y., van Mourik, H., Möller, B., Llavata-Peris, C.I., and Weijers, D. (2011). A Versatile Set of Ligation-Independent Cloning Vectors for Functional Studies in Plants. *Plant Physiology* 156, 1292-1299.
  7. Hellens, R.P., Edwards, E.A., Leyland, N.R., Bean, S., and Mullineaux, P.M. (2000). pGreen: a versatile and flexible binary Ti vector for Agrobacterium-mediated plant transformation. *Plant Mol Biol* 42, 819-832.
  8. Xiang, D., Venglat, P., Tibiche, C., Yang, H., Risseuw, E., Cao, Y., Babic, V., Cloutier, M., Keller, W., Wang, E., et al. (2011). Genome-Wide Analysis Reveals Gene Expression and Metabolic Network Dynamics during Embryo Development in Arabidopsis. *Plant Physiology* 156, 346-356.
  9. Wellmer, F., Riechmann, J.L., Alves-Ferreira, M., and Meyerowitz, E.M. (2004). Genome-Wide Analysis of Spatial Gene Expression in Arabidopsis Flowers. *The Plant Cell* 16, 1314-1326.
  10. Smyth Gordon, K. (2004). Linear Models and Empirical Bayes Methods for Assessing Differential Expression in Microarray Experiments. In *Statistical Applications in Genetics and Molecular Biology*, Volume 3. p. 1.
  11. Mähönen, A.P., Bonke, M., Kauppinen, L., Riikonen, M., Benfey, P.N., and Helariutta, Y. (2000). A novel two-component hybrid molecule regulates vascular morphogenesis of the Arabidopsis root. *Genes & Development* 14, 2938-2943.
